# Supplementary material
Source: PubMed Central journal article supplement (PMC5624331)
Supplement: NIHMS892919-supplement-253_2017_8394_MOESM1_ESM.pdf [file NIHMS892919-supplement-253_2017_8394_MOESM1_ESM.pdf]

# Applied Microbiology and Biotechnology

## Phagocytosis of *Escherichia coli* Biofilm Cells with Different Aspect Ratios: A Role of Substratum Material Stiffness

Yanrui Zhao<sup>1,2†</sup>, Fangchao Song<sup>1†</sup>, Hao Wang<sup>1</sup>, Junlin Zhou<sup>2\*</sup>, Dacheng Ren<sup>1,3,4,5\*</sup>

<sup>1</sup> Department of Biomedical and Chemical Engineering, Syracuse University, Syracuse, NY 13244, United States.

<sup>2</sup> Department of Orthopedics, Beijing Chao Yang Hospital, Capital Medical University, Chaoyang District, Beijing 100020, People's Republic of China.

<sup>3</sup> Department of Civil and Environmental Engineering, Syracuse University, Syracuse, NY 13244, United States.

<sup>4</sup> Department of Biology, Syracuse University, Syracuse, NY 13244, United States.

<sup>5</sup> Syracuse Biomaterials Institute, Syracuse University, Syracuse, NY 13244, United States.

### Corresponding Authors

\*Dacheng Ren: Phone +1-315-443-4409. Fax +1-315-443-9175. Email: dren@syr.edu

\*Junlin Zhou: Phone +86-10-8523-1240. Email: doctorzyr@163.com

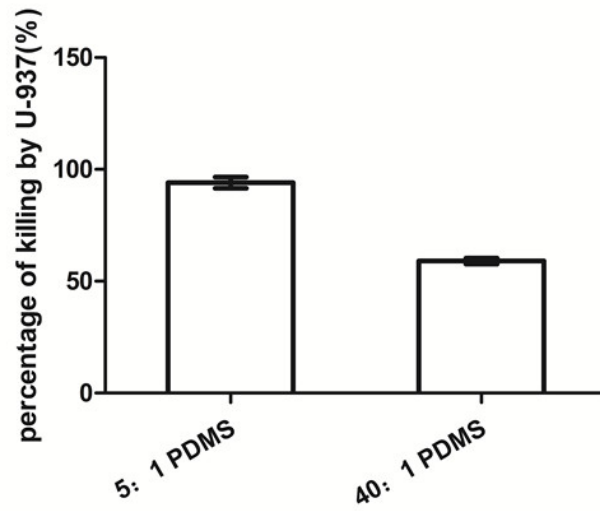

**Fig. S1. Phagocytosis of 5-h biofilm cells of *E. coli* RP437/pGLO.** The graph shows the percentage of killing after incubating with U-937 for 1 h in RPMI medium supplemented with 10% FBS at 37°C and 5% CO<sub>2</sub> on 5:1 or 40:1 PDMS surfaces ( $p=0.007$ , one-way ANOVA).

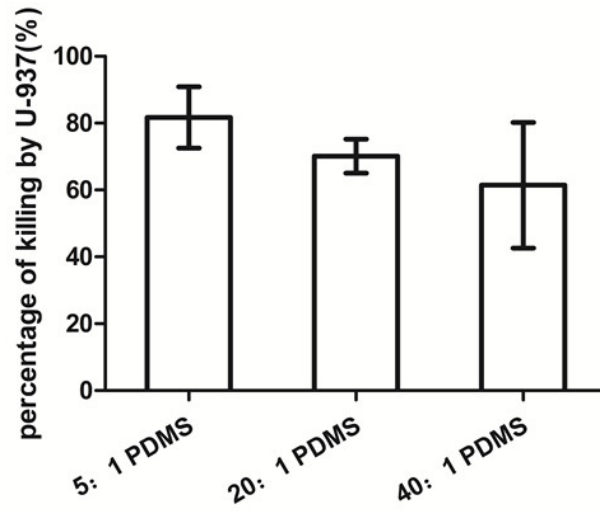

**Fig. S2. Phagocytosis of 5-h biofilm cells of *E. coli* RP437/pBAD-mPlum.** The graph shows the percentage of killing of bacterial cells after incubating with U-937 for 90 min in RPMI medium supplemented with 10% FBS at 37°C and 5% CO<sub>2</sub> on 5:1, 20:1 or 40:1 PDMS surfaces ( $r=0.63$ ,  $p=0.0019$ , Pearson correlation analysis).

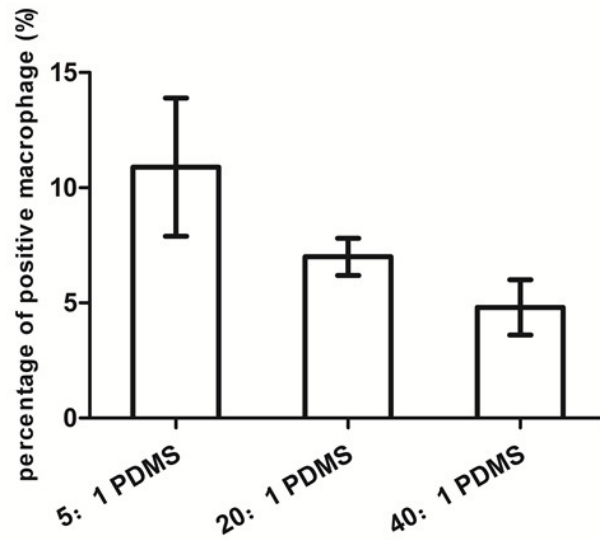

**Fig. S3. Percentage of positive macrophage cells (associated with *E. coli* RP437/pBAD-mPlum cells) under microscopy.** The graph shows the percentage of positive U-937 cells after incubating with 5-h *E. coli* RP437/pBAD-mPlum biofilms for 90 min in RPMI medium supplemented with 10% FBS at 37°C and 5% CO<sub>2</sub> ( $r=0.83$ ,  $p<0.001$ , Pearson correlation analysis).

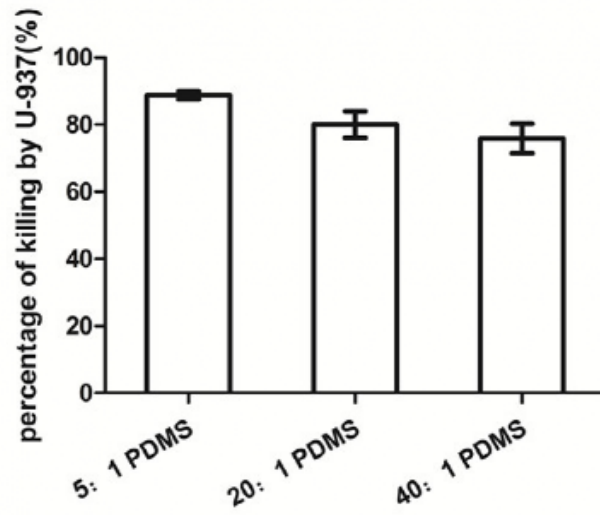

**Fig. S4. Phagocytosis of 5-h *E. coli* RP437/pBAD-mPlum biofilm cells with U937 cells attached first.** The graph shows the killing of bacterial cells detached from 5:1, 20:1 or 40:1 PDMS surfaces, which were incubated with U-937 cells (attached on the same surfaces of petri dish) for 90 min in RPMI medium supplemented with 10% FBS at 37°C and 5% CO<sub>2</sub> ( $r=0.80$ ,  $p=0.0095$ , Pearson correlation analysis).

**Table S1:** Raw data of related figures.

| Figures | CFU or Imaging Analysis |       |       |           |       |       |           |       |       |
|---------|-------------------------|-------|-------|-----------|-------|-------|-----------|-------|-------|
|         | 5:1 PDMS                |       |       | 20:1 PDMS |       |       | 40:1 PDMS |       |       |
|         | BT                      | AT    | KR/RP | BT        | AT    | KR/RP | BT        | AT    | KR/RP |
| 1       | 200000                  | 40000 | 80%   | 130000    | 40000 | 69%   | 180000    | 60000 | 67%   |
|         | 150000                  | 20000 | 87%   | 200000    | 50000 | 75%   | 200000    | 70000 | 65%   |
|         | 130000                  | 20000 | 85%   | 200000    | 60000 | 70%   | 120000    | 50000 | 58%   |
| 2       | 22                      | 2     | 9.1%  | 63        | 4     | 6.3%  | 33        | 2     | 6.1%  |
|         | 26                      | 3     | 11.5% | 81        | 6     | 7.4%  | 36        | 2     | 5.6%  |
|         | 23                      | 2     | 8.7%  | 63        | 5     | 7.9%  | 45        | 2     | 4.4%  |
|         | 25                      | 3     | 12.0% |           |       |       | 20        | 1     | 5.0%  |
|         | 28                      | 3     | 10.7% |           |       |       | 35        | 2     | 5.7%  |
| 5       | 40000                   | 11000 | 72%   | 40000     | 11000 | 72%   | 30000     | 10000 | 67%   |
|         | 40000                   | 10000 | 75%   | 40000     | 14000 | 65%   | 30000     | 11000 | 63%   |
|         | 40000                   | 9000  | 78%   | 40000     | 13000 | 68%   | 30000     | 11000 | 63%   |
| 6       | 30                      | 4     | 12.9% | 56        | 6     | 10.7% | 46        | 3     | 6.5%  |
|         | 41                      | 5     | 12.2% | 57        | 5     | 7.0%  | 46        | 4     | 8.7%  |
|         | 50                      | 6     | 13.3% | 66        | 6     | 9.1%  | 40        | 3     | 7.5%  |
|         | 41                      | 6     | 14.6% |           |       |       | 42        | 3     | 7.1%  |
|         | 35                      | 5     | 14.3% |           |       |       | 26        | 2     | 7.7%  |
| 7       | 110000                  | 20000 | 82%   | 90000     | 30000 | 67%   | 100000    | 32000 | 68%   |
|         | 80000                   | 21000 | 74%   | 80000     | 24000 | 70%   | 80000     | 30000 | 62%   |
|         | 70000                   | 12000 | 83%   | 40000     | 11000 | 72%   | 80000     | 33000 | 59%   |

CFU: colony forming unit

BT: cell number before treatment

AT: cell number after treatment

KR: killing ratio

RP: ratio of positive macrophages (associated with bacteria).
